# Supplementary material
Source: MDPI journal article supplement (https://www.mdpi.com/2077-1312/9/5/549)
Supplement: s1 [file s1]

## Supplementary Materials

**Figure S1:** Variations of environmental factors among three depths. S: surface, M: middle, B: bot-tom.

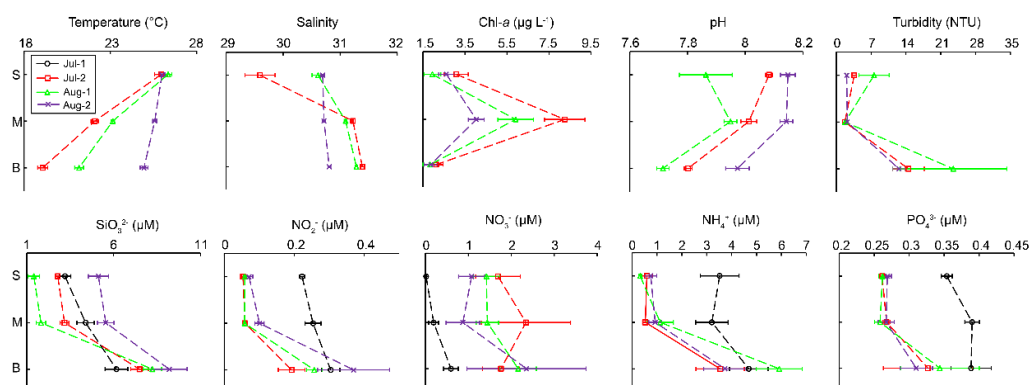

**Table S1** Results of ANOSIM testing the differences in assemblage structure of *Synechococcus* genotypes at separate sampling cruises.

|                             | <b>R</b> | <b>P-value</b> |
|-----------------------------|----------|----------------|
| Sampling time (global test) | 0.59     | <0.01          |
| Jul-1 VS. Jul-2             | 0.16     | <0.01          |
| Jul-1 VS. Aug-1             | 0.79     | <0.01          |
| Jul-1 VS. Aug-2             | 0.97     | <0.01          |
| Jul-2 VS. Aug-1             | 0.48     | <0.01          |
| Jul-2 VS. Aug-2             | 0.84     | <0.01          |
| Aug-1 VS. Aug-2             | 0.49     | <0.01          |
